# Supplementary material
Source: Springer Nature journal article supplement (https://www.springermedizin.de/resource/supplementary/13049_2011_300_MOESM1_ESM.pdf/9666292)
Supplement: MOESM1 [file 9666292]

Randomised (n = 239)  
DVT 30  
ACS 57  
AA 61  
ABI 91

Allocated to POCT (n = 109)  
DVT 10  
ACS 22  
AA 29  
ABI 48

Allocated to Central laboratory (n = 120)  
DVT 20  
ACS 25  
AA 32  
ABI 43

Analysed (n = 107)  
DVT 10  
ACS 22  
AA 27  
ABI 48  
Excluded 2

Analysed (n = 115)  
DVT 19  
ACS 23  
AA 30  
ABI 43  
Excluded 5
